# Supplementary material for: Rapid single cell evaluation of human disease and disorder targets using REVEAL: SingleCell™
Source: PubMed Central journal article supplement (PMC7785925; doi:10.1186/s12864-020-07300-8), 2021-01-06
Supplement: 12864_2020_7300_MOESM1_ESM.pdf [file 12864_2020_7300_MOESM1_ESM.pdf]

**Table S1****Covid-19 Cell Atlas Metadata Validation:**

The Covid-19 Cell Atlas ([www.covid19cellatlas.org](http://www.covid19cellatlas.org)) at the time of publication consists of 35 projects (datasets), out of which 34 projects were utilized for this paper. Aldinger et al. was not used due to inconsistencies in the matrix file.

The process of compiling the metadata (e.g., number of unique donors, number of samples) started by exploring the 'cells.tsv' file, which was available for each project. We found that the fields that could identify the metadata in the 'cells.tsv' files were not standardized among the different projects. There were projects with different fields for the same attribute (e.g., 'donor' or 'Source' for unique donors), or no relevant field at all.

We then proceeded to go through each project's associated publication, GEO accession entries (if any), and supplementary data files. Values obtained from this exploratory search for fields such as unique number of cell-types, donors, samples were corroborated by analyzing the 'cells.tsv' file as well as the '.mtx' file for each project. For projects that have unpublished results, we contacted the researchers to confirm metadata information.

| Project Name                             | Number of Unique Biological Samples (Donors) | Number of Cells | Comments                                                                                                                                               | Assay Type: Library prep, sequencing instrument, alignment                               |
|------------------------------------------|----------------------------------------------|-----------------|--------------------------------------------------------------------------------------------------------------------------------------------------------|------------------------------------------------------------------------------------------|
| aldinger_cerebellum_restricted.processed | NA                                           | 71553           | Unpublished work                                                                                                                                       | Illumina TruSeq RNA Access Prep Kit, Illumina HiSeq 2000, STAR                           |
| cheng18.processed                        | Uncertain                                    | 68036           |                                                                                                                                                        | 10x Chromium 3' v2, (Illumina HiSeq 2500, HiSeq 4000, NovaSeq 6000), STAR                |
| habib17.processed                        | Uncertain                                    | 13067           |                                                                                                                                                        | Illumina Nextera, Illumina NextSeq 500, STAR                                             |
| henry18_0.processed                      | Uncertain                                    | 32921           | Text in paper suggests only 3 donors out of a total 11 used for sc analysis; GEO entry also suggests 3 donors; cell numbers in dataset do not match    | 10x Chromium 3' v2, Illumina NextSeq 500, STAR                                           |
| lako_cornea.processed                    | NA                                           | 21343           | Unpublished work                                                                                                                                       | NA                                                                                       |
| millier20.processed                      | Uncertain (8 anatomical samples)             | 36807           | Samples identified by 'Sample' in cells.tsv                                                                                                            | 10x Chromium, Illumina HiSeq 4000, STAR                                                  |
| popescu19.processed                      | Uncertain (14 donors likely - see Comments)  | 95461           | cells.tsv field 'batch' can be parsed to obtain just the suffix which shows 14 donors. The EBI metadata file shows 14 donors but the id's do not match | (10x Chromium 3' v2 and V(D)J, Illumina Nextera XT (for SS2)), Illumina HiSeq 4000, STAR |

|                               |                                                 |       |                                                                                                                                                                                                                                |                                                    |
|-------------------------------|-------------------------------------------------|-------|--------------------------------------------------------------------------------------------------------------------------------------------------------------------------------------------------------------------------------|----------------------------------------------------|
| stewart19_adult.processed     | Uncertain (Potentially 2 donors - see Comments) | 40268 | From HCA: Study has 8 donors in total - 6 fetal and 2 mature. This dataset seems to have the 2 mature donors based on reported cell count in HCA and the publication. Pre-print version mentions different number of donors    | 10x Chromium v2, NA, STAR                          |
| vallier_restricted.processed  | NA                                              | 8414  | Unpublished work                                                                                                                                                                                                               | NA, NA, NA                                         |
| vento18_10x.processed         | Uncertain (7 donors most likely - see Comments) | 59705 | Project 'Source' (EBI) on covid19cellatlas.org suggests 6 donors, and the cells.tsv is missing a few replicates for 3 of the 6 donors; On HCA, appears like there are 11 donors (for 10x); Publication states 7 donors for 10x | 10x Chromium v2, Illumina HiSeq 4000, STAR         |
| vento18_ss2.processed         | Uncertain (5 donors most likely - see Comments) | 4891  | Project 'Source' (EBI) does not have metadata info for the SS2 sequenced samples (at least the link from covid19cellatlas.org does not); Paper states 5 donors for SS2                                                         | Smart-seq2, Illumina HiSeq 2000, HISAT2            |
| deprez19_restricted.processed | 10 Donors                                       | 77969 |                                                                                                                                                                                                                                | 10x Chromium 3' v2, Illumina NextSeq 500/550, STAR |
| baron16.processed             | 4 donors                                        | 7714  | batch' field in cells.tsv has 12 unique specimens. The suffix 'human1_' is an identifier for the 4 human donors (3 replicates each for donor 1 & 2; donor 3 has 4 replicates;                                                  | Illumina CEL-SEQ, Illumina HiSeq 2500, STAR        |

|                                    |                                                         |        |                                                                                                                                                |                                                                                     |
|------------------------------------|---------------------------------------------------------|--------|------------------------------------------------------------------------------------------------------------------------------------------------|-------------------------------------------------------------------------------------|
|                                    |                                                         |        | donor 4 has 2 replicates)                                                                                                                      |                                                                                     |
| guo18_donor.processed              | 3 donors, 6 samples (2 replicates each)                 | 6199   | Each replicate for a donor has a suffix 'Donor_1_rep1' and 'Donor_1_rep2' - this leads to 6 unique 'Source' entries (but only 3 unique donors) | 10x Chromium 3' v2, Illumina HiSeq 2500, STAR                                       |
| james20.processed                  | 5 donors                                                | 41650  | number of cell types for each donor (21-25)                                                                                                    | 10x Chromium 3' v2 and 5' v2, (Illumina HiSeq 4000 and Illumina NovaSeq 6000), STAR |
| litvinukova20_restricted.processed | 14 donors (6 different regions sampled from each donor) | 467939 |                                                                                                                                                | 10x Chromium, NA, STAR                                                              |
| lukassen20_airway_orig.processed   | 4 donors                                                | 17451  |                                                                                                                                                | 10x Chromium 3' v2, Illumina HiSeq4000, STAR                                        |
| lukassen20_lung_orig.processed     | 12 donors                                               | 39778  |                                                                                                                                                | 10x Chromium v2, Illumina HiSeq 4000, STAR                                          |
| macparland18.processed             | 5 donors                                                | 8444   |                                                                                                                                                | 10x Chromium 3' v2, Illumina HiSeq 2500, STAR                                       |
| madissoon20_oesophagus.processed   | 6 donors; 23 specimens                                  | 87947  |                                                                                                                                                | 10x Chromium 3' v2, Illumina HiSeq 4000, STAR                                       |
| madissoon20_spleen.processed       | 5 donors; 19 specimens                                  | 94257  |                                                                                                                                                | 10x Chromium 3' v2, Illumina HiSeq 4000, STAR                                       |
| martin19.processed                 | 11 donors                                               | 32458  | Only 'Uninvolved' ileal samples in data set                                                                                                    | 10x Chromium 3' v2, Illumina NextSeq 500, STAR                                      |
| menon19.processed                  | 3 donors; 6 specimens                                   | 20091  |                                                                                                                                                | 10x Chromium 3' v3, Illumina HiSeq 4000, STAR                                       |
| park20.processed                   | 23 donors; 74 specimens                                 | 255901 | Project 'Source' (EBI) on covid19cellatlas.org shows 24 donors (cells.tsv has 23 - missing donor is A45 with only 1 sample)                    | (10x Chromium 3' and 5', Illumina Nextera (for SS2)), Illumina HiSeq 4000, STAR     |
| smillie19_epi.processed            | 12 donors                                               | 34772  | Study has 30 donors (18 with Ulcerative Colitis and 12 Healthy controls); this dataset only contains the 12 healthy donors (id's match between | (10x Chromium 3' v2 and v3; GemCode v1), (Illumina NextSeq and HiSeq), STAR         |

|                                                      |                        |       |                                                                                                                                                                                                                                      |                                                   |
|------------------------------------------------------|------------------------|-------|--------------------------------------------------------------------------------------------------------------------------------------------------------------------------------------------------------------------------------------|---------------------------------------------------|
|                                                      |                        |       | cells.tsv and supplementary metadata from publication)                                                                                                                                                                               |                                                   |
| vieira19_Alveoli_and_parenchyma_anonymised.processed | 6 donors               | 12971 |                                                                                                                                                                                                                                      | 10x Chromium 3', Illumina HiSeq 4000, STAR        |
| vieira19_Bronchi_anonymised.processed                | 7 donors (most likely) | 16873 | cells.tsv shows 7 unique donor id's. The supplementary data spreadsheet also suggests 7 donors. Publication shows 9 donors (broken up into 2 groups, so there might be an overlap). Could not confirm donor id's with another source | 10x Chromium 3', Illumina HiSeq 4000, STAR        |
| vieira19_Nasal_anonymised.processed                  | 2 donors               | 7087  | cells.tsv shows 2 unique donor id's. The supplementary data spreadsheet also suggests 2 donors. Publication shows 2 donors.                                                                                                          | 10x Chromium 3', Illumina HiSeq 4000, STAR        |
| voigt19.processed                                    | 3 donors; 6 specimens  | 4335  | Each donor has 2 types of specimens (macula and peripheral) - 6 in total. (Study looks at 7 donors, but donors 4-7 are in expt 2, not in this dataset)                                                                               | 10x Chromium v3, Illumina HiSeq 4000, STAR        |
| wang20_colon.processed                               | 2 Donors               | 4329  |                                                                                                                                                                                                                                      | 10x Chromium 3', Illumina HiSeq X Ten PE150, STAR |
| wang20_ileum.processed                               | 2 Donors               | 5980  |                                                                                                                                                                                                                                      | 10x Chromium 3', Illumina HiSeq X Ten PE150, STAR |
| wang20_rectum.processed                              | 2 Donors               | 3797  |                                                                                                                                                                                                                                      | 10x Chromium 3', Illumina HiSeq X Ten PE150, STAR |
